# Supplementary figures and images for: Ubiquitylation by Rab40b/Cul5 regulates Rap2 localization and activity during cell migration
Source: PubMed Central journal article supplement — J Cell Biol. 2022 Mar 16;221(4):e202107114. doi: 10.1083/jcb.202107114 (PMC8931537; doi:10.1083/jcb.202107114), 2022-03-16

**A**

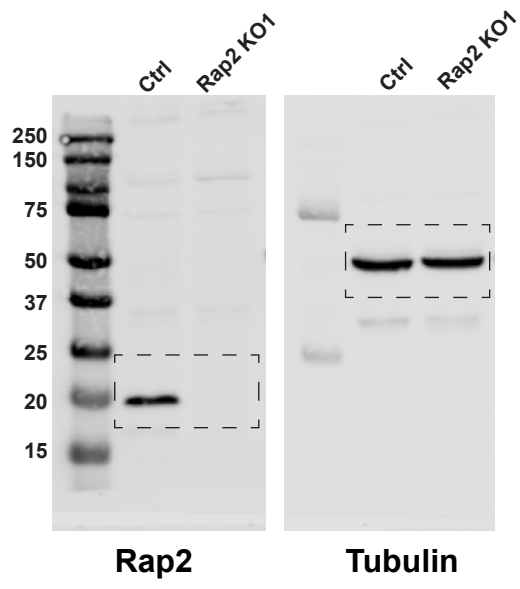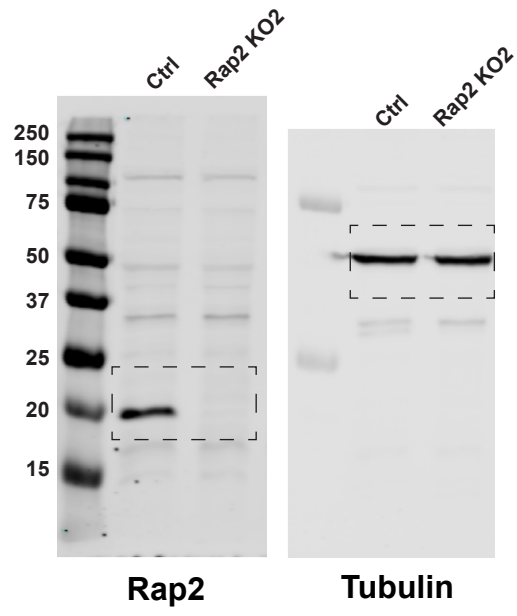

Supplement: JCB_202107114_SourceDataF1.pdf [file JCB_202107114_SourceDataF1.pdf]

**G**

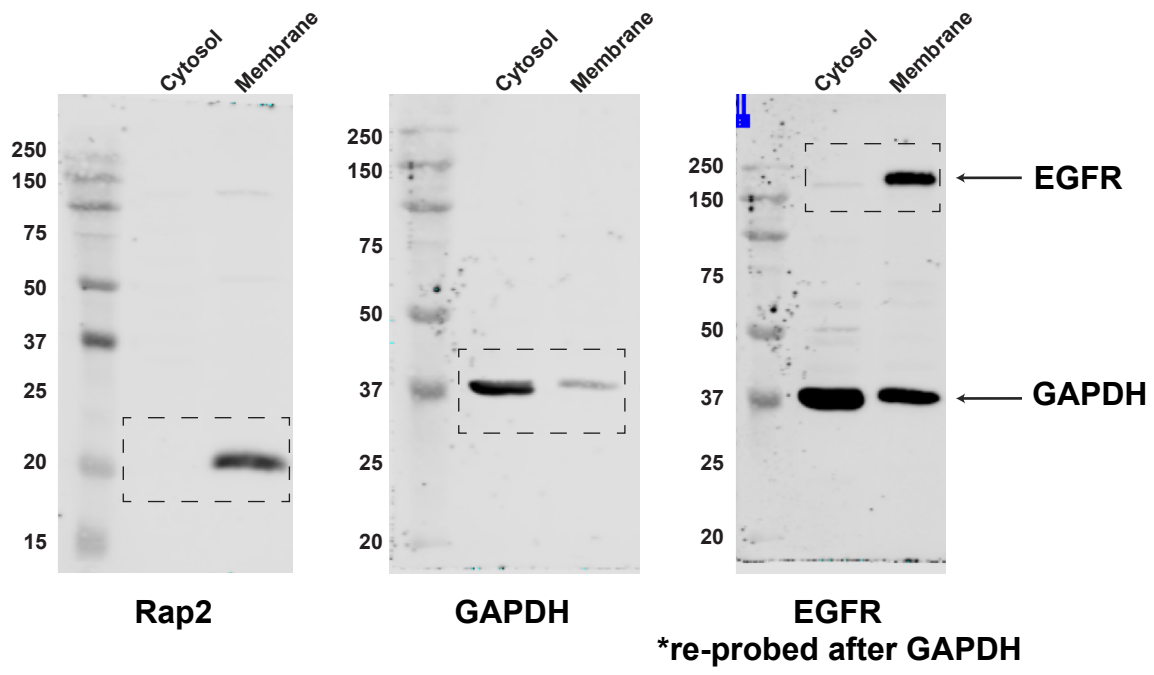

Supplement: JCB_202107114_SourceDataF2.pdf [file JCB_202107114_SourceDataF2.pdf]

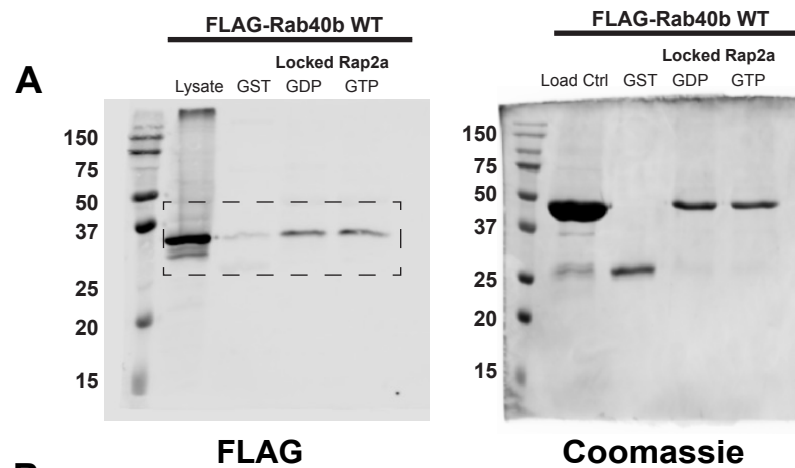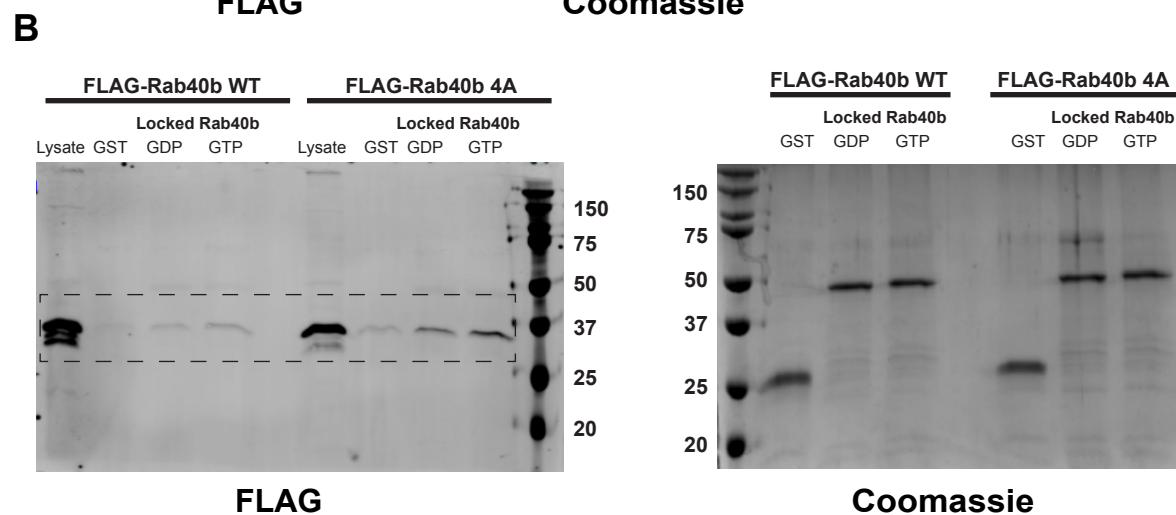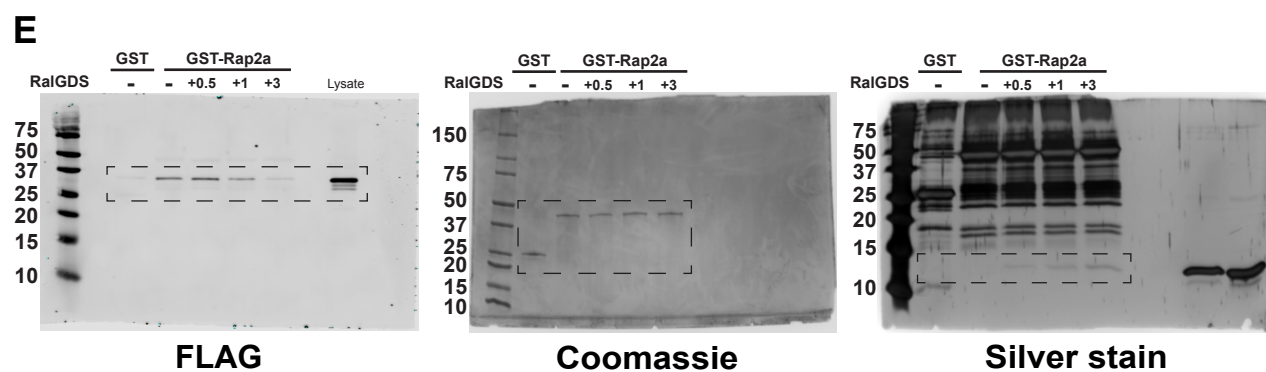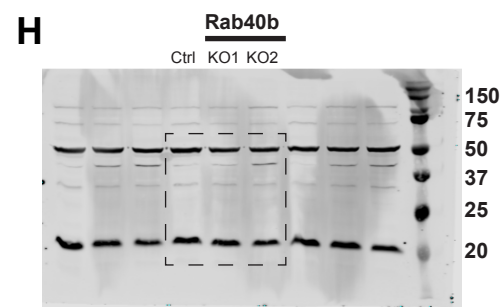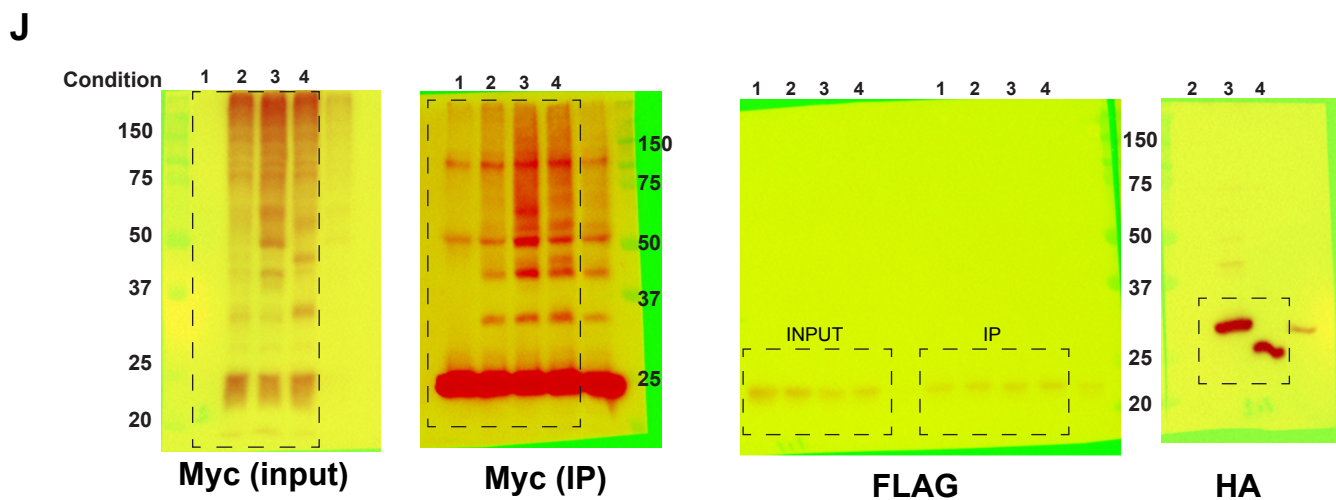

Supplement: JCB_202107114_SourceDataF7.pdf [file JCB_202107114_SourceDataF7.pdf]

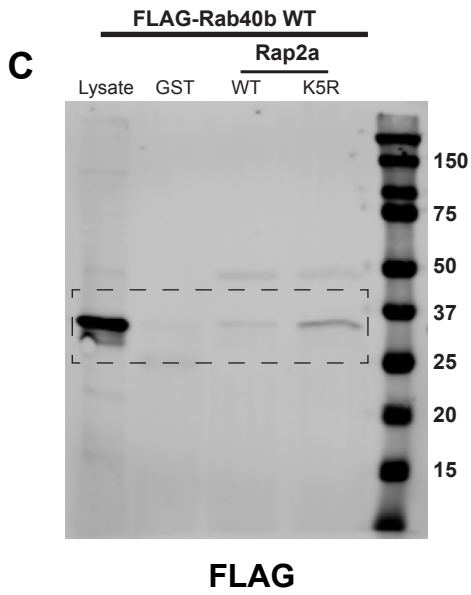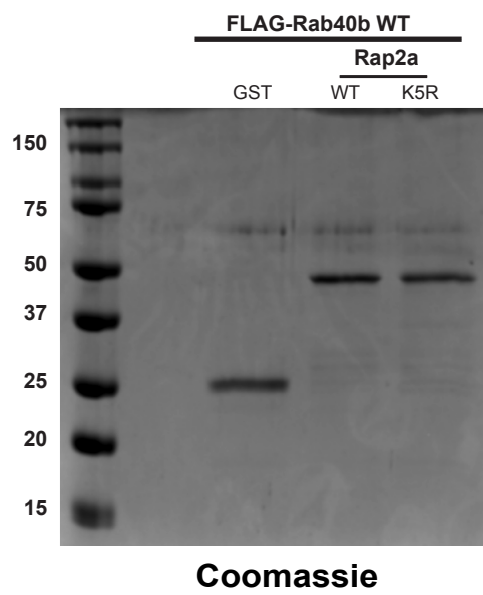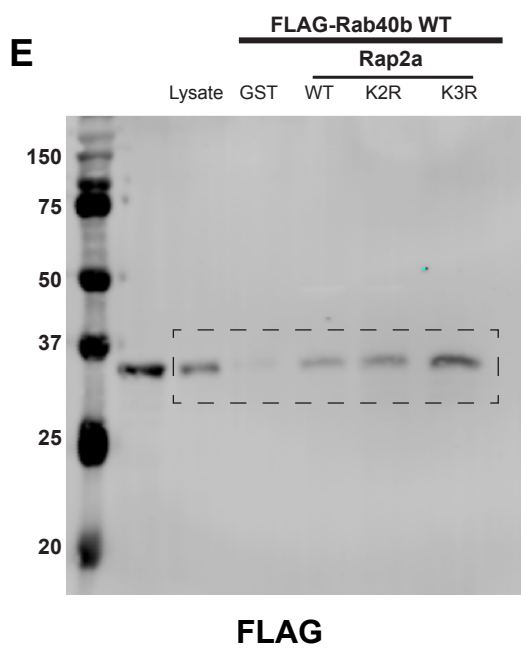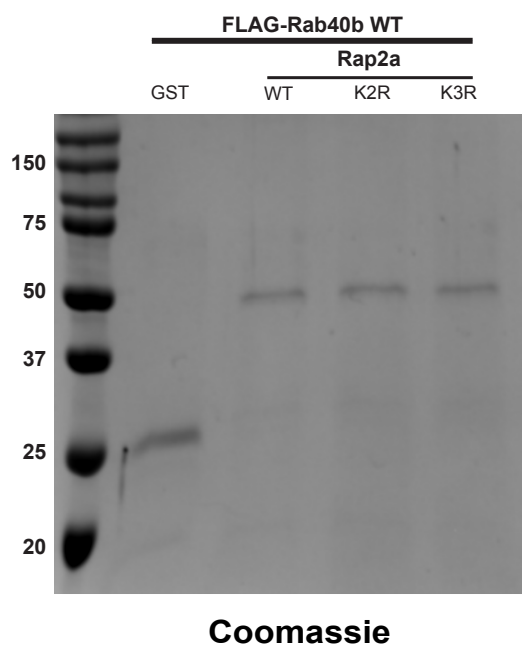

Supplement: JCB_202107114_SourceDataF8.pdf [file JCB_202107114_SourceDataF8.pdf]

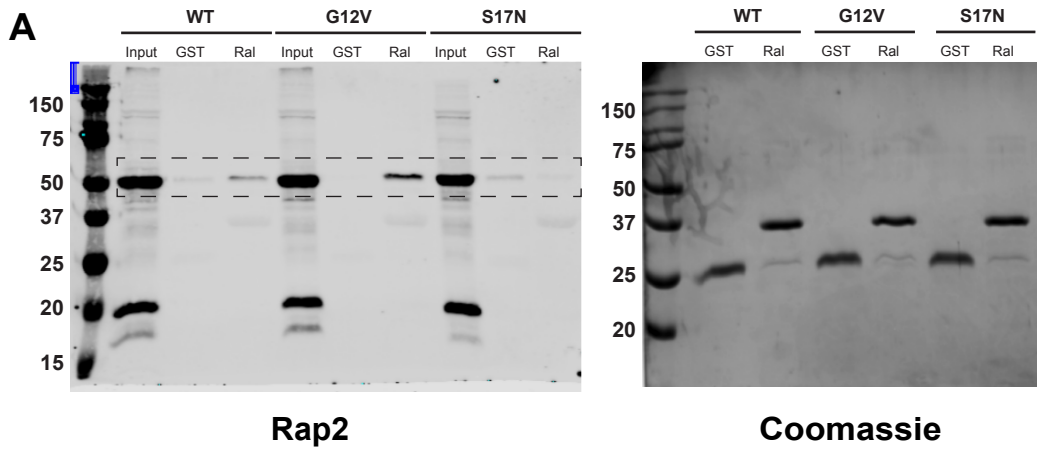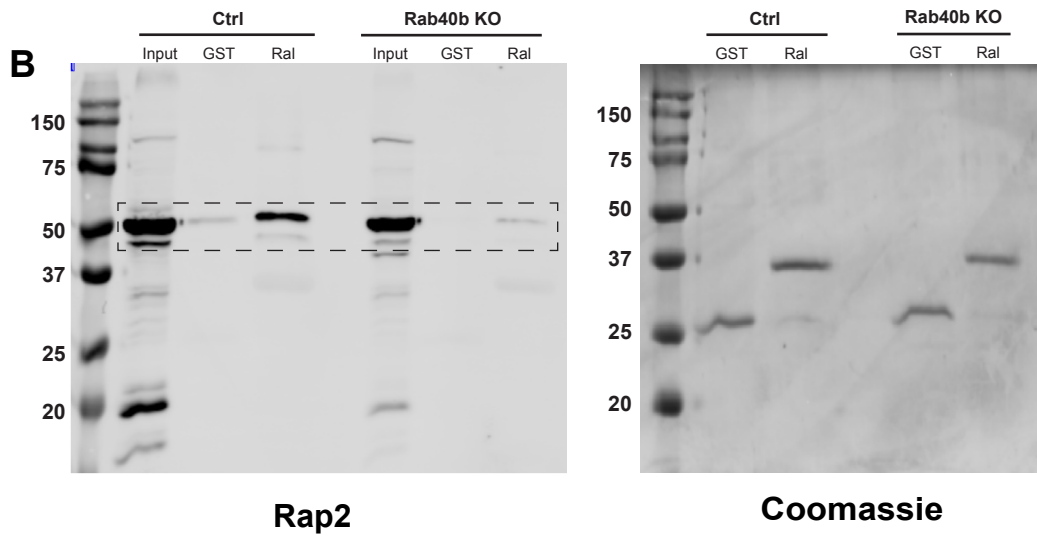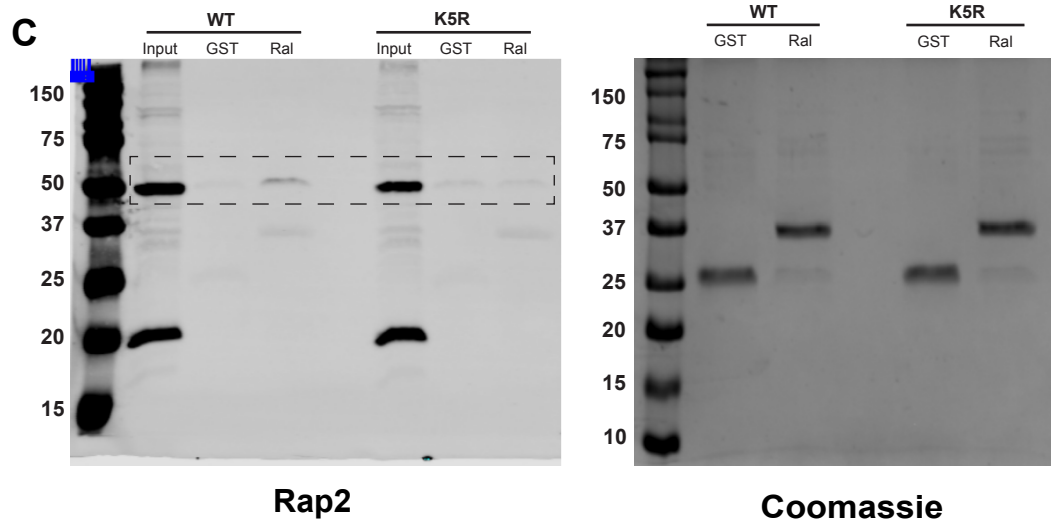

Supplement: JCB_202107114_SourceDataF9.pdf [file JCB_202107114_SourceDataF9.pdf]

**C**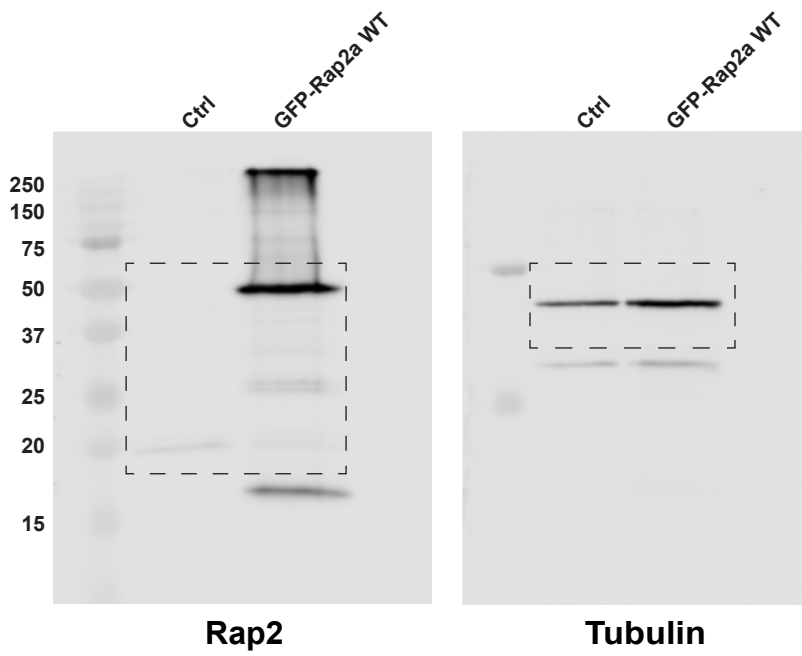**D**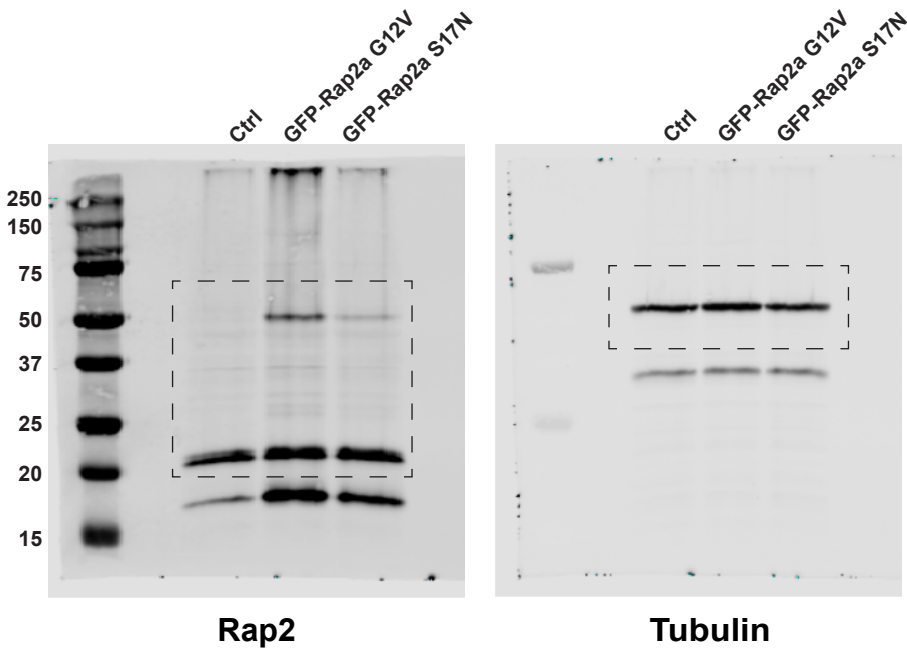**E**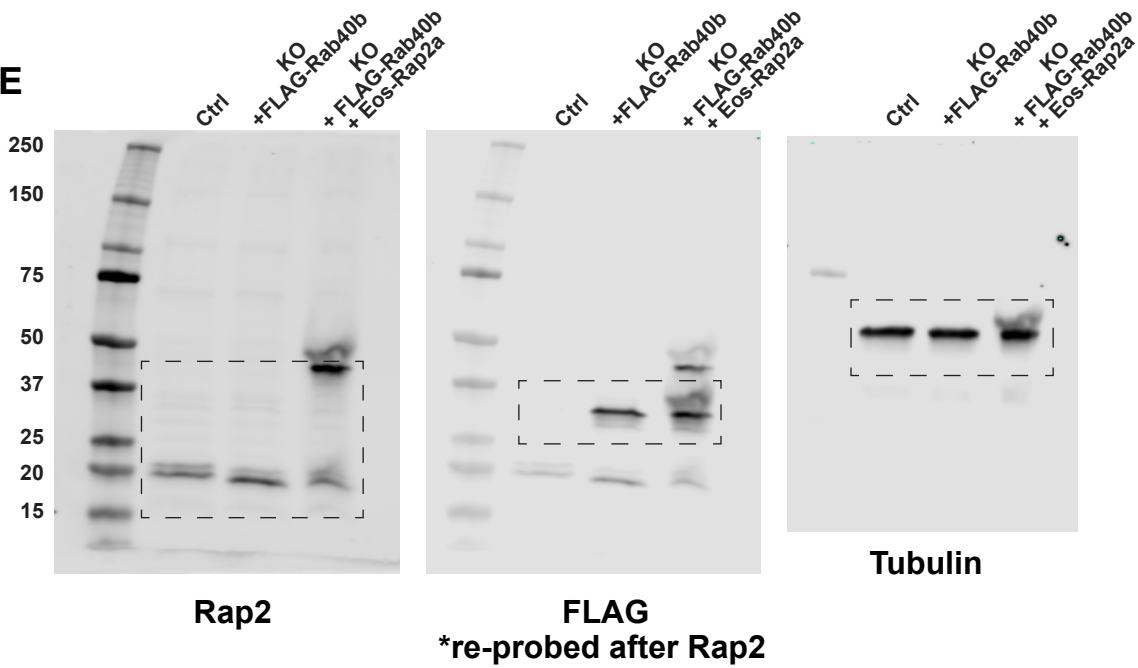

Supplement: JCB_202107114_SourceDataFS1.pdf [file JCB_202107114_SourceDataFS1.pdf]

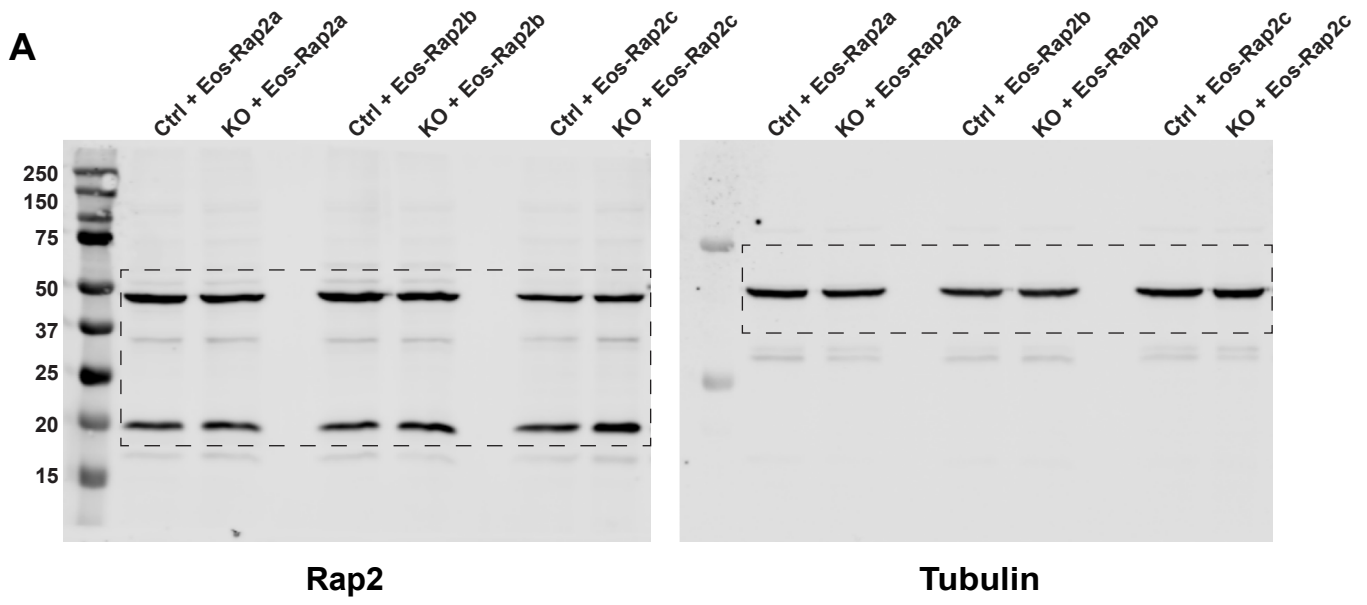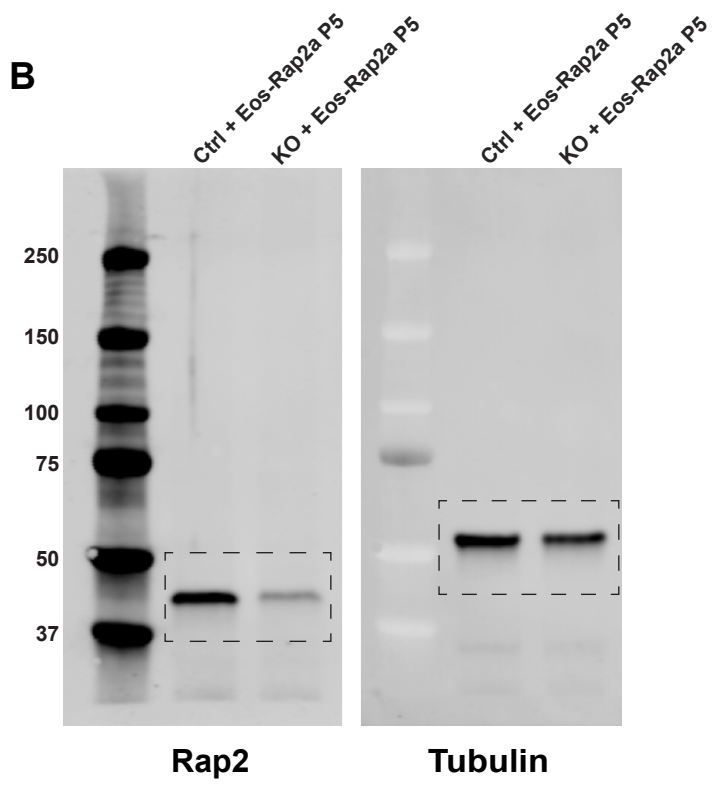

Supplement: JCB_202107114_SourceDataFS2.pdf [file JCB_202107114_SourceDataFS2.pdf]

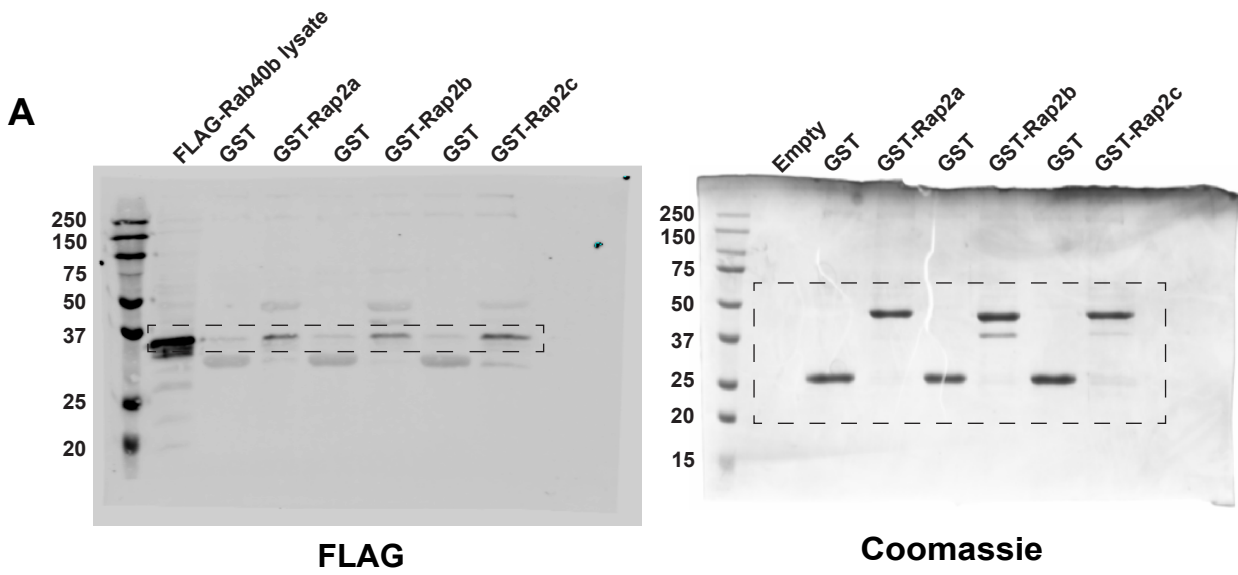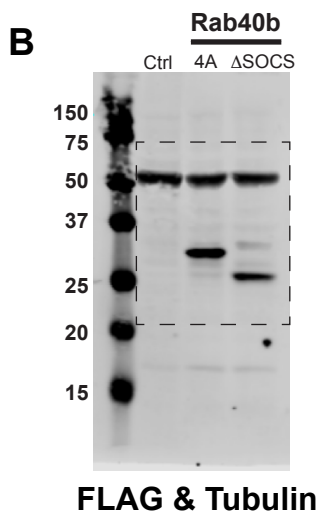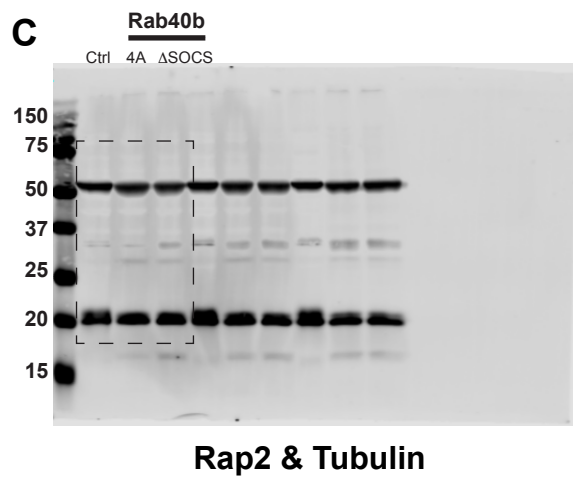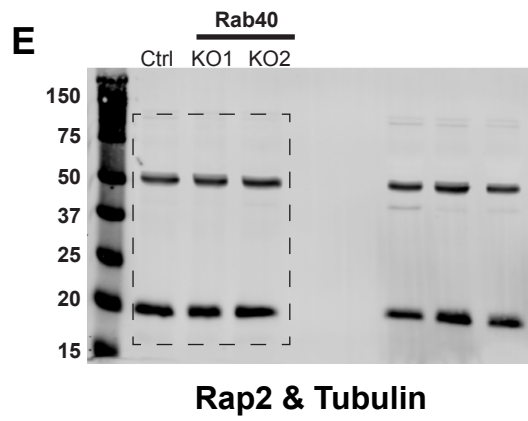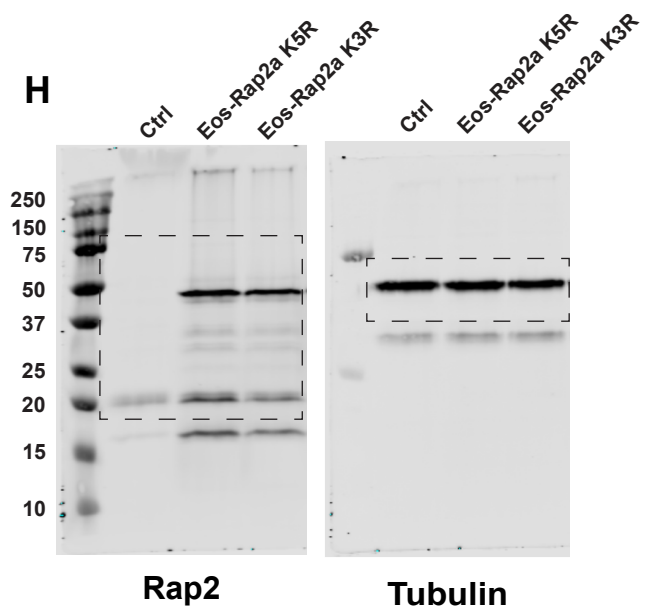

Supplement: JCB_202107114_SourceDataFS3.pdf [file JCB_202107114_SourceDataFS3.pdf]

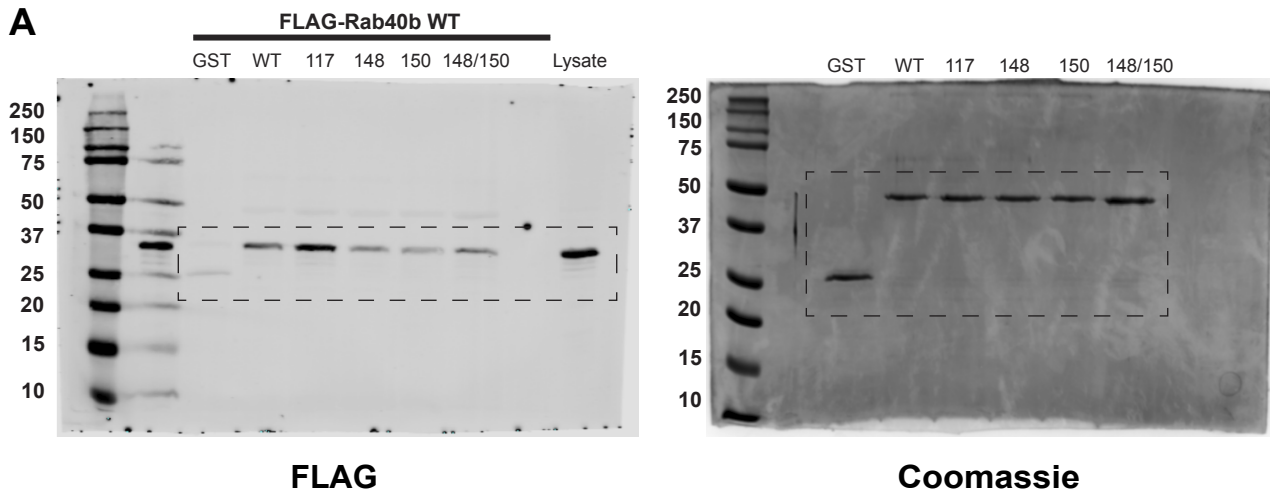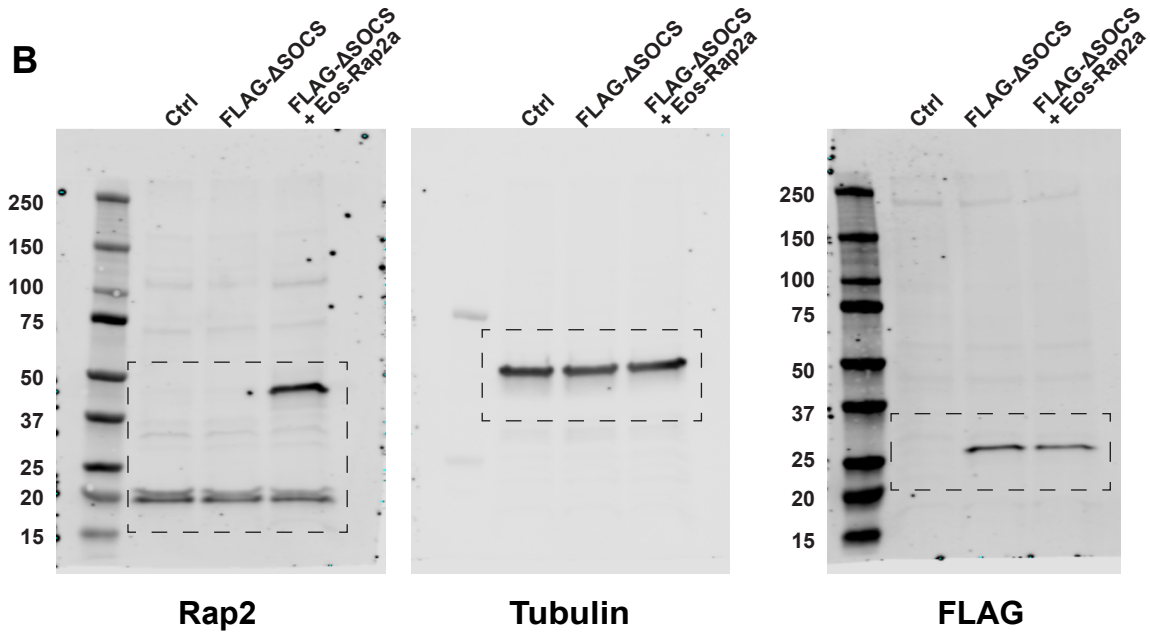

Supplement: JCB_202107114_SourceDataFS4.pdf [file JCB_202107114_SourceDataFS4.pdf]
